# Supplementary material for: Communication strategies for rare cancers: a systematic review protocol
Source: Springer Nature journal article supplement (doi:10.1186/s13643-019-1017-5), 2019-04-23
Supplement: MOESM2 [file 16669980]

## **Communication Strategies in Rare Cancers: A Systematic Review Protocol.**

Catherine Bell, Katie Kerr, Kerry Moore, Charlene McShane, Lesley Anderson, Amy Jayne McKnight, Helen McAneney.

**Additional File 2.** Search strategy in various databases, being adapted for each database as necessary.

### **Search Strategy in MEDLINE**

| #   | Search Term                                                                                                                                    |
|-----|------------------------------------------------------------------------------------------------------------------------------------------------|
| 1.  | (rare adj5 (cancer* or carc* or neoplas* or malignan* or adenocarcinoma* or sarcoma* or tumo?r* or carc*)).mp.                                 |
| 2.  | communication/ or "cell phone use"/ or information seeking behavior/ or literacy/                                                              |
| 3.  | writing/ or medical writing/ or research report/                                                                                               |
| 4.  | ((oral* or verbal* or spoken) adj5 communicat*).mp.                                                                                            |
| 5.  | Medical Illustration/                                                                                                                          |
| 6.  | health education/ or consumer health information/ or health literacy/ or health fairs/ or health promotion/ or patient education as topic/     |
| 7.  | mass media/ or motion pictures/ or radio/ or television/ or videodisc recording/ or compact disks/ or cd-i/ or cd-rom/ or videotape recording/ |
| 8.  | Media ADJ0 campaign*.mp.                                                                                                                       |
| 9.  | Internet/ or blogging/ or social media/                                                                                                        |
| 10. | (twitter* or tweet* or facebook* or wordpress* or "social network*" or instagram* or snapchat*).mp.                                            |
| 11. | (leaflet* or pamphlet* or flyer* or brochure*).mp.                                                                                             |
| 12. | webcasts/                                                                                                                                      |

|     |                                                                                                                                                                                                                                                                                                                                                                                                                                                                                                  |
|-----|--------------------------------------------------------------------------------------------------------------------------------------------------------------------------------------------------------------------------------------------------------------------------------------------------------------------------------------------------------------------------------------------------------------------------------------------------------------------------------------------------|
| 13. | podcast*.mp.                                                                                                                                                                                                                                                                                                                                                                                                                                                                                     |
| 14. | education, medical/ or education, medical, continuing/ or education, medical, graduate/ or "internship and residency"/ or education, medical, undergraduate/ or teaching rounds/                                                                                                                                                                                                                                                                                                                 |
| 15. | Caregivers/                                                                                                                                                                                                                                                                                                                                                                                                                                                                                      |
| 16. | education, dental/ or education, dental, continuing/ or education, dental, graduate/ or education, nursing/ or education, nursing, associate/ or education, nursing, baccalaureate/ or education, nursing, continuing/ or education, nursing, diploma programs/ or education, nursing, graduate/ or nursing education research/ or education, pharmacy/ or education, pharmacy, continuing/ or education, pharmacy, graduate/ or pharmacy residencies/ or education, public health professional/ |
| 17. | dentist-patient relations/ or nurse-patient relations/ or physician-patient relations/ or researcher-subject relations/                                                                                                                                                                                                                                                                                                                                                                          |
| 18. | "breaking bad news".mp.                                                                                                                                                                                                                                                                                                                                                                                                                                                                          |
| 19. | doctor ADJ0 patient ADJ0 communication*.mp.                                                                                                                                                                                                                                                                                                                                                                                                                                                      |
| 20. | internet ADJ0 forum*.mp.                                                                                                                                                                                                                                                                                                                                                                                                                                                                         |
| 21. | community networks/ or social support/ or psychosocial support systems/                                                                                                                                                                                                                                                                                                                                                                                                                          |
| 22. | ((support* or survivor*) adj5 group*).mp.                                                                                                                                                                                                                                                                                                                                                                                                                                                        |
| 23. | congresses as topic/ or consensus development conferences as topic/ or consensus development conferences, nih as topic/                                                                                                                                                                                                                                                                                                                                                                          |
| 24. | call centers/ or call centres/ or hotlines/                                                                                                                                                                                                                                                                                                                                                                                                                                                      |
| 25. | help?line*.mp.                                                                                                                                                                                                                                                                                                                                                                                                                                                                                   |
| 26. | 2 or 3 or 4 or 5 or 6 or 7 or 8 or 9 or 10 or 11 or 12 or 13 or 14 or 15 or 16 or 17 or 18 or 19 or 20 or 21 or 22 or 23 or 24 or 25                                                                                                                                                                                                                                                                                                                                                             |
| 27. | 1 and 26                                                                                                                                                                                                                                                                                                                                                                                                                                                                                         |

### **Web of Science Search Strategy**

| <b>Search #</b> | <b>Results</b> | <b>Search Terms</b>                                                                                                                                                                                                                                                                                                                                                                                                                                                                                     |
|-----------------|----------------|---------------------------------------------------------------------------------------------------------------------------------------------------------------------------------------------------------------------------------------------------------------------------------------------------------------------------------------------------------------------------------------------------------------------------------------------------------------------------------------------------------|
| # 26            |                | #25 AND #1                                                                                                                                                                                                                                                                                                                                                                                                                                                                                              |
| # 25            |                | #24 OR #23 OR #22 OR #21 OR #20 OR #19 OR #18 OR #17 OR #16 OR #15 OR #14 OR #13 OR #12 OR #11 OR #10 OR #9 OR #8 OR #7 OR #6 OR #5 OR #4 OR #3 OR #2                                                                                                                                                                                                                                                                                                                                                   |
| # 24            |                | (TS=(help?line*))                                                                                                                                                                                                                                                                                                                                                                                                                                                                                       |
| # 23            |                | (TS=(call centers/ or hotlines/))                                                                                                                                                                                                                                                                                                                                                                                                                                                                       |
| # 22            |                | (TS=((support* or survivor*) NEAR/5 group*))                                                                                                                                                                                                                                                                                                                                                                                                                                                            |
| # 21            |                | (TS=(community networks/ or social support/ or psychosocial support systems/))                                                                                                                                                                                                                                                                                                                                                                                                                          |
| # 20            |                | (TS=("internet forum*"))                                                                                                                                                                                                                                                                                                                                                                                                                                                                                |
| # 19            |                | (TS=("doctor NEAR/0 patient NEAR/0 communication*"))                                                                                                                                                                                                                                                                                                                                                                                                                                                    |
| # 18            |                | (TS=("breaking bad news"))                                                                                                                                                                                                                                                                                                                                                                                                                                                                              |
| # 17            |                | (TS=(dentist-patient relations/ or nurse-patient relations/ or physician-patient relations/ or researcher-subject relations/))                                                                                                                                                                                                                                                                                                                                                                          |
| # 16            |                | (TS=(education, dental/ or education, dental, continuing/ or education, dental, graduate/ or education, nursing/ or education, nursing, associate/ or education, nursing, baccalaureate/ or education, nursing, continuing/ or education, nursing, diploma programs/ or education, nursing, graduate/ or nursing education research/ or education, pharmacy/ or education, pharmacy, continuing/ or education, pharmacy, graduate/ or pharmacy residencies/ or education, public health professional/)) |
| # 15            |                | (TS=(Caregivers/))                                                                                                                                                                                                                                                                                                                                                                                                                                                                                      |
| # 14            |                | (TS=(education, medical/ or education, medical, continuing/ or education, medical, graduate/ or "internship and residency"/ or education, medical, undergraduate/ or teaching rounds/))                                                                                                                                                                                                                                                                                                                 |
| # 13            |                | (TS=(podcast*))                                                                                                                                                                                                                                                                                                                                                                                                                                                                                         |
| # 12            |                | (TS=(webcasts/))                                                                                                                                                                                                                                                                                                                                                                                                                                                                                        |
| # 11            |                | (TS=(leaflet* or pamphlet* or flyer* or brochure*))                                                                                                                                                                                                                                                                                                                                                                                                                                                     |
| # 10            |                | (TS=(twitter* or tweet* or facebook* or wordpress* or "social network*" or instagram* or snapchat*))                                                                                                                                                                                                                                                                                                                                                                                                    |
| # 9             |                | (TS=(Internet/ or blogging/ or social media/))                                                                                                                                                                                                                                                                                                                                                                                                                                                          |

|     |  |                                                                                                                                                       |
|-----|--|-------------------------------------------------------------------------------------------------------------------------------------------------------|
|     |  |                                                                                                                                                       |
| # 8 |  | (TS=(Media NEAR/0 campaign*))                                                                                                                         |
| # 7 |  | (TS=(mass media/ or motion pictures/ or radio/ or television/ or videodisc recording/ or compact disks/ or cd-i/ or cd-rom/ or videotape recording/)) |
| # 6 |  | (TS=(health education/ or consumer health information/ or health literacy/ or health fairs/ or health promotion/ or patient education as topic/))     |
| # 5 |  | (TS=(Medical Illustration/))                                                                                                                          |
| # 4 |  | (TS=((oral* or verbal* or spoken) NEAR/5 communicat*))                                                                                                |
| # 3 |  | (TS=(writing/ or medical writing/ or research report/))                                                                                               |
| # 2 |  | (TS=(communication/ or "cell phone use"/ or information seeking behavior/ or literacy/))                                                              |
| # 1 |  | TS=(rare near/5 (cancer* or carc* or neoplas* or malignan* or adenocarcinoma* or sarcoma* or tumor*))                                                 |

**CINAHL Plus Search Terms**

| Search Number | Search Term                                                                                                                                                                                                                                                                                                                                                                    |
|---------------|--------------------------------------------------------------------------------------------------------------------------------------------------------------------------------------------------------------------------------------------------------------------------------------------------------------------------------------------------------------------------------|
| S8 AND S62    |                                                                                                                                                                                                                                                                                                                                                                                |
| S62           | S9 OR S10 OR S11 OR S12 OR S13 OR S14 OR S15 OR S16 OR S17 OR S18 OR S19 OR S20 OR S21 OR S22 OR S23 OR S24 OR S25 OR S26 OR S27 OR S28 OR S29 OR S30 OR S31 OR S32 OR S33 OR S34 OR S35 OR S36 OR S37 OR S38 OR S39 OR S40 OR S41 OR S42 OR S43 OR S44 OR S45 OR S46 OR S47 OR S48 OR S49 OR S50 OR S51 OR S52 OR S53 OR S54 OR S55 OR S56 OR S57 OR S58 OR S59 OR S60 OR S61 |
| S61           | "help#line"                                                                                                                                                                                                                                                                                                                                                                    |
| S60           | "hotline*" OR (MH "Telephone Information Services")                                                                                                                                                                                                                                                                                                                            |
| S59           | "call cent*"                                                                                                                                                                                                                                                                                                                                                                   |
| S58           | "consensus development conference"                                                                                                                                                                                                                                                                                                                                             |
| S57           | "congress*"                                                                                                                                                                                                                                                                                                                                                                    |
| S56           | "survivor*"                                                                                                                                                                                                                                                                                                                                                                    |
| S55           | (MH "Support Groups") OR "support groups"                                                                                                                                                                                                                                                                                                                                      |
| S54           | "psychosocial support system*"                                                                                                                                                                                                                                                                                                                                                 |
| S53           | "social support"                                                                                                                                                                                                                                                                                                                                                               |
| S52           | (MH "Community Networks") OR "community network*"                                                                                                                                                                                                                                                                                                                              |
| S51           | "internet forum*"                                                                                                                                                                                                                                                                                                                                                              |
| S50           | "doctor patient communication*"                                                                                                                                                                                                                                                                                                                                                |
| S49           | "breaking bad news"                                                                                                                                                                                                                                                                                                                                                            |
| S48           | (MH "Researcher-Subject Relations")                                                                                                                                                                                                                                                                                                                                            |
| S47           | (MH "Dentist-Patient Relations") OR (MH "Physician-Patient Relations") OR (MH "Nurse-Patient Relations")                                                                                                                                                                                                                                                                       |
| S46           | (MH "Education, Nursing") OR (MH "Education, Nursing, Continuing") OR (MH "Education, Nursing, Graduate") OR (MH "Education, Nursing, Associate") OR (MH "Education, Nursing, Diploma Programs") OR (MH "Education, Nursing, Baccalaureate")                                                                                                                                   |

|     |                                                                                                                      |
|-----|----------------------------------------------------------------------------------------------------------------------|
| S45 | "dental education" OR (MH "Education, Dental") OR (MH "Dental Health Education")                                     |
| S44 | (MH "Caregivers") OR "caregiver*"                                                                                    |
| S43 | (MH "Education, Medical")                                                                                            |
| S42 | "podcast*"                                                                                                           |
| S41 | "webcast*" OR (MH "Webcasts")                                                                                        |
| S40 | "handout*"                                                                                                           |
| S39 | "brochure*"                                                                                                          |
| S38 | "flyer*"                                                                                                             |
| S37 | "pamphlet" OR (MH "Pamphlets")                                                                                       |
| S36 | "leaflet*"                                                                                                           |
| S35 | "snapchat*"                                                                                                          |
| S34 | "instagram"                                                                                                          |
| S33 | (MH "Social Networks") OR (MH "Social Networking") OR (MH "Social Network Analysis (Saba CCC)") OR "social network*" |
| S32 | "wordpress"                                                                                                          |
| S31 | "facebook"                                                                                                           |
| S30 | "tweet*"                                                                                                             |
| S29 | "twitter"                                                                                                            |
| S28 | (MH "Internet") OR "internet"                                                                                        |
| S27 | "blogging" OR (MH "Blogs")                                                                                           |
| S26 | "media campaign*" OR (MH "Social Media")                                                                             |
| S25 | "cd*" OR (MH "CD ROM")                                                                                               |
| S24 | (MH "Videodiscs") OR (MH "Audiorecording") OR (MH "Videorecording") OR "videodisc recording*"                        |
| S23 | (MH "Television") OR "television"                                                                                    |

|     |                                                                     |
|-----|---------------------------------------------------------------------|
| S22 | (MH "Radio") OR "radio"                                             |
| S21 | (MH "Motion Pictures") OR "motion picture*"                         |
| S20 | "mass media" OR (MH "Communications Media")                         |
| S19 | (MH "Patient Education")                                            |
| S18 | (MH "Health Promotion") OR "health promotion*"                      |
| S17 | (MH "Health Fairs") OR "health fair*"                               |
| S16 | (MH "Consumer Health Information") OR "consumer health information" |
| S15 | (MH "Health Education") OR "health education"                       |
| S14 | (MH "Medical Illustration") OR "medical illustration"               |
| S13 | (MH "Writing") OR (MH "Medical Writing") OR (MH "Report Writing")   |
| S12 | "literacy"                                                          |
| S11 | "information seeking behavior"                                      |
| S10 | "cell phone use"                                                    |
| S9  | "communication"                                                     |
| S8  | S1 OR S2 OR S3 OR S4 OR S5 OR S6 OR S7                              |
| S7  | "rare carcinoma*"                                                   |
| S6  | "rare neoplasm*"                                                    |
| S5  | "rare sarcoma*"                                                     |
| S4  | "rare adenocarcinoma*"                                              |
| S3  | "rare tumour*"                                                      |
| S2  | "rare tumor*"                                                       |
| S1  | "rare cancer*"                                                      |

### **PubMed Search**

(communication\*) AND (((((((("rare cancer\*") OR "rare carcinoma\*") OR "rare neoplas\*") OR "rare malignan\*") OR "rare adenocarcinoma\*") OR "rare sarcoma\*") OR "rare tumor\*") OR "rare tumour\*")
